# Supplementary material
Source: PubMed Central journal article supplement (PMC3662519)
Supplement: supp_mct078_mct078supp.pdf [file supp_mct078_mct078supp.pdf]

## SUPPLEMENTARY DATA

### 1. SITE DESCRIPTIONS

*Mexico.* The region “El Huizache” is one of the most species-diverse sites for Cactaceae in America (Hernández *et al.*, 2001). It lies in the southern portion of the Chihuahuan Desert, and is located in the municipality of Guadalcázar in the northern part of the state of San Luis Potosí, Mexico (22° 30'-23° 00' N, 100° 00'-100° 30' W). The area is a lowland plain with mountain systems of different sizes. Rainfall is concentrated in summer, and the annual average is 300 mm in lowland plains, increasing with the altitude to 800 mm at the highest points. Average mean temperature varies from 18 to 22° C (MacMahon and Wagner, 1986; Arriaga *et al.*, 2000; Hernández *et al.*, 2001).

Cuatrociénegas is another point of high diversity of globular cacti (Hernández and Bárcenas, 1995; Arriaga *et al.*, 2000; Dinerstein *et al.*, 2000). The region is an intermontane valley in the Sierra Madre Oriental at the eastern edge of the Chihuahuan Desert in the Mexican state of Coahuila (26° 42'-27° 00' N, 101° 52'-102° 25' W). The valley is bordered by limestone mountains, and is bisected by the Sierra San Marcos y Pinos. The valley receives <200 mm of precipitation per year, mainly between May and October. Though it receives little rain, the valley has abundant subterranean water, which emerges at the surface in numerous small pools. Temperatures varies from 18 and 22°C, with a extreme exceeding 44°C in the summer, and falling to below 0°C during the winter (MacMahon and Wagner, 1986; Arriaga *et al.*, 2000; Dinerstein *et al.*, 2000).

*South Africa.* The Great Richtersveld is located in the arid north-west of South Africa. This area belongs to the Namaqualand-Namib domain (Wyk and Smith, 2001; Desmet, 2007). The Richterseld sunsets of flat sandy plains to step mountains of volcanic rock, and the lushness of the Orange River. This region has winter-rainfall, with temperatures 12-17° C along the coast and inland temperatures around 32° C, in summer reaching >50° C (Wyk and Smith, 2001; Desmet, 2007). Rain is rare event, with an average of 68 mm per year.

The region of Knersvlakte represents one of the richest for dwarf succulent plant diversity in the world (Cowling *et al.*, 1998; Wyk and Smith, 2001; Schmiedel, and Jürgens, 1999). It is situated in the northwestern part of Western Cape Province of South Africa (30°45'–31°40' S, 18°15'–19°00' E), and belongs to the domain of Namaqualand (Schmiedel, and Jürgens, 1999; Desmet, 2007). It is a broad plain bounded by the Oliphant River to the South, the Rocky Hills of Namaqualand to the North, the Sandveld and granite hills of the Spektakel (the Hardveld) to the West, and the Bokkeveld Mountains to the East. The Knersvlakte is a predominantly winter-rainfall desert region. The climate of the region is mild with light frost in winter. Rainfall is low, about 100-175 mm, and occurs mainly in winter (May-September), but the fog provides extra precipitation.

The mean annual temperature is about 20°C with an extreme about 46°C (Wyk and Smith, 2001; Desmet, 2007).

The Little Karoo is an intermontane valley with high succulent plant species richness (Wyk and Smith, 2001; Schmiedel, and Jürgens, 1999). It is located in the southwest of the South Africa (33°25'–55°00' S, 20°10'–22°30' E), and belongs to the Southern Karoo Domain. The valley is bounded by a mountain belt and is divided in the western region and eastern region by the mountains of Sandberg and Rooiberg. The winters are mild and without severe frost, and the summers are hot and dry. The Little Karoo receives an annual rainfall between 125-300 mm, with a mean annual temperature of 18°C. Annual rainfall of 15-55 mm in the Orange River Valley and greater of the mountains (Wyk and Smith, 2001).

## 2. BIOCLIMATIC VARIABLES. List of 19 bioclimatic variables that were analysed

---

|        |                                                      |
|--------|------------------------------------------------------|
| Bio 1  | Annual Mean Temperature                              |
| Bio 2  | Mean Diurnal Range                                   |
| Bio 3  | Isothermality                                        |
| Bio 4  | Temperature Seasonality                              |
| Bio 5  | Max. Temperature of Warmest Month                    |
| Bio 6  | Min. Temperature of Coldest Month                    |
| Bio 7  | Temperature Annual Range                             |
| Bio 8  | Mean Temperature of Wettest Quarter                  |
| Bio 9  | Mean Temperature of Driest Quarter                   |
| Bio 10 | Mean Temperature of Warmest Quarter                  |
| Bio 11 | Mean Temperature of Coldest Quarter                  |
| Bio 12 | Annual Precipitation                                 |
| Bio 13 | Precipitation of Wettest Month                       |
| Bio 14 | Precipitation of Driest Month                        |
| Bio 15 | Precipitation Seasonality (Coefficient of Variation) |
| Bio 16 | Precipitation of Wettest Quarter                     |
| Bio 17 | Precipitation of Driest Quarter                      |
| Bio 18 | Precipitation of Warmest Quarter                     |
| Bio 19 | Precipitation of Coldest Quarter                     |

---

### 3. CHECKLIST. Species checklist of the different families of succulent plants used in the analyses

#### **Aizoaceae**

- Argyroderma crateriforme* (L. Bolus) N. E. Br.  
*Argyroderma congregatum* L. Bolus  
*Argyroderma delaetii* C. A. Maass  
*Argyroderma pearsonii* (N. E. Br.) Schwantes  
*Argyroderma subalbum* (N. E. Br.) N. E. Br.  
*Argyroderma theartii* van Jaarsv.  
*Conophytum auriflorum* Tischer  
*Conophytum bilobum* (Marloth) N. E. Br.  
*Conophytum blandum* L. Bolus  
*Conophytum breve* N. E. Br.  
*Conophytum calculus* (Berger) N. E. Br.  
*Conophytum cubicum* Pavelka  
*Conophytum ectypum* N. E. Br.  
*Conophytum ernstii* S. A. Hammer  
*Conophytum flavum* N. E. Br.  
*Conophytum fraternum* (N. E. Br.) N. E. Br.  
*Conophytum frutescens* Schwantes  
*Conophytum gratum* (N. E. Br.) N. E. Br.  
*Conophytum herreanthus* S. A. Hammer  
*Conophytum joubertii* Lavis  
*Conophytum lithopsoides* L. Bolus  
*Conophytum loescheanum* Tischer  
*Conophytum longum* N. E. Br.  
*Conophytum meyeri* N. E. Br.  
*Conophytum minimum* (Haw.) N. E. Br.  
*Conophytum minusculum* (N. E. Br.) N. E. Br.  
*Conophytum minutum* (Haw.) N. E. Br.  
*Conophytum obcordellum* (Haw.) N. E. Br.  
*Conophytum obscurum* N. E. Br.  
*Conophytum pageae* (N. E. Br.) N. E. Br.  
*Conophytum pellucidum* Schwantes  
*Conophytum quaesitum* (N. E. Br.) N. E. Br.  
*Conophytum regale* Lavis  
*Conophytum ricardianum* Losch & Tischler  
*Conophytum saxetanum* (N. E. Br.) N. E. Br.  
*Conophytum schlechteri* Schwantes  
*Conophytum stephanii* Schwantes  
*Conophytum stevens-jonesianum* L. Bolus  
*Conophytum subfenestratum* Schwantes  
*Conophytum tantillum* N. E. Br.  
*Conophytum truncatum* (Thunb) N. E. Br.  
*Conophytum uviforme* (Haw.) N. E. Br.  
*Conophytum velutinum* Schwantes  
*Conophytum wettsteinii* (Berger) N. E. Br.  
*Diplosoma luckhoffii* (L. Bolus) Schwantes  
*Gibbaeum album* N. E. Br.  
*Gibbaeum angulipes* (L. Bolus) N. E. Br.  
*Gibbaeum dispar* N. E. Br.  
*Gibbaeum geminum* N. E. Br.  
*Gibbaeum gibbosum* (Haw.) N. E. Br.  
*Gibbaeum heathii* (N. E. Br.) L. Bolus  
*Gibbaeum hortenseae* (N. E. Br.) Thiede & Klak  
*Gibbaeum nebrownii* Tischler  
*Gibbaeum pachypodium* (Kensit) L. Bolus  
*Gibbaeum petrense* (N.E.Br.) Tischler  
*Gibbaeum pilosulum* (N. E. Br.) N. E. Br.  
*Gibbaeum pubescens* (Haw.) N. E. Br.  
*Gibbaeum pubescens* subsp. *shandii* (N. E. Br.) Glen  
*Gibbaeum velutinum* (L. Bolus) Schwantes  
*Lithops marmorata* N. E. Br.  
*Lithops meyeri* L. Bolus  
*Lithops olivacea* L. Bolus

## **Apocynaceae**

*Duvalia caespitosa* Haw.  
*Duvalia elegans* (Masson) Haw.  
*Duvalia parviflora* N. E. Br.  
*Duvaliaranthus x albostriatus* Bruyns  
*Gonolobus luteus* (Masson) Druce  
*Hoodia alstonii* (N. E. Br.) Plowes  
*Hoodia gordonii* (Sweet) ex Decne  
*Hoodia pilifera* (L. f.) Plowes  
*Huernia clavigera* (Jacq.) Haw.  
*Huernia humilis* Haw.  
*Huernia pillansii* N. E. Br.  
*Huernia praestans* N. E. Br.  
*Larryleachia cactiformis* (Hook.) Plowes  
*Larryleachia dinteri* (A. Berger) Plowes  
*Larryleachia perlata* (Dinter) Plowes  
*Stisseria geminata* (Masson) Kuntze  
*Quaqua pillansii* (N. E. Br.) Bruyns

## **Cactaceae**

*Ariocarpus bravoanus* H. M. Hern. & E. F. Anderson  
*Ariocarpus fissuratus* (Engelm.) K. Schum.  
*Ariocarpus kotschoubeyanus* (Lem.) K. Schum.  
*Ariocarpus retusus* Scheidw.  
*Astrophytum capricorne* (A. Dietr.) Britton & Rose  
*Astrophytum myriostigma* Lem.  
*Coryphantha delicada* L. Bremer  
*Coryphantha georgii* Boed.  
*Coryphantha glanduligera* (Otto & A. Dietr.) Lem.  
*Coryphantha macromeris* (Engelm.) Britton & Rose  
*Coryphantha odorata* Boed.  
*Coryphantha poselgeriana* (D. Dietr.) Britton & Rose

*Coryphantha pseudoechinus* Boed.  
*Coryphantha pulleineana* (Backeb.) Glass  
*Coryphantha werdermannii* Boed.  
*Coryphantha wohlschlagerei* Holzeis  
*Echinocactus horizonthalonius* Lem.  
*Echinocereus cinerascens* (DC.) Lem.  
*Echinocereus enneacanthus* Engelm.  
*Echinocereus enneacanthus* subsp. *brevispinus* (W.O. Moore) N.P. Taylor  
*Echinocereus pectinatus* (Scheidw.) Engelm.  
*Echinocereus pectinatus* var. *wenigeri* L.D. Benson  
*Echinocereus stramineus* (Engelm.) F. Seitz  
*Echinomastus mariposensis* Hester  
*Epithelantha micromeris* (Engelm.) F.A.C. Weber ex Britton & Rose  
*Ferocactus echidne* (DC.) Britton & Rose  
*Ferocactus histrix* (DC.) G.E. Linds.  
*Ferocactus pilosus* (Galeotti ex Salm-Dyck) Werderm.  
*Ferocactus recurvus* (Mill.) Borg  
*Lophophora williamsii* (Lem. ex Salm-Dyck) J.M. Coult.  
*Mammillaria albicoma* Boed.  
*Mammillaria aureilanata* Backeb.  
*Mammillaria compressa* DC.  
*Mammillaria formosa* Galeotti ex Scheidw.  
*Mammillaria formosa* subsp. *microthele* (Muehlenpf.) D|R. Hunt  
*Mammillaria geminispina* Haw.  
*Mammillaria heyderi* Muehlenpf.  
*Mammillaria lasiacantha* Engelm.  
*Mammillaria magnimamma* Haw.  
*Mammillaria pottsii* Scheer ex Salm-Dyck  
*Mammillaria prolifera* (Mill.) Haw.

*Mammillaria schiedeana* Ehrenb. ex  
Schltdl.  
*Mammillaria sphaerica* A. Dietr.  
*Mammillaria surculosa* Boed  
*Mammillaria uncinata* Zucc. ex Pfeiff.  
*Mammilloidia candida* (Scheidw.) Buxb.  
*Neolloydia conoidea* (DC.) Britton & Rose  
*Sclerocactus uncinatus* Galeotti ex Pfeiff.  
*Thelocactus bicolor* (Galeotti) Britton &  
Rose  
*Thelocactus conothelos* (Regel & Klein)  
F.M. Knuth  
*Thelocactus hexaedrophorus* (Lem.) Britton  
& Rose  
*Thelocactus tulensis* (Poselger) Britton &  
Rose  
*Turbinicarpus beguinii* (N.P. Taylor)  
Mosco & Zanovello  
*Turbinicarpus pseudopectinatus* (Backeb.)  
Glass & R.A. Foster  
*Turbinicarpus saueri* (Boed.) John & Riha  
subsp. *knuthianus* (Boed.) Lüthy  
*Turbinicarpus schmiedickeanus* (Boed.)  
Buxb. & Backeb.  
*Turbinicarpus viereckii* (Werderm.) John &  
Riha

### **Euphorbiaceae**

*Euphorbia fasciculata* Thunb.  
*Euphorbia heptagona* L.  
*Euphorbia mammillaris* L.  
*Euphorbia melanohydrata* Nel  
*Euphorbia pillansii* N. E. Br.  
*Euphorbia pseudoglobosa* Marloth  
*Euphorbia schoenlandii* Pax.  
*Euphorbia susannae* Marloth  
*Euphorbia tuberculata* Jacq.  
*Euphorbia tuberculatoides* N. E. Br.
